# Supplementary material
Source: MDPI journal article supplement (https://www.mdpi.com/2071-1050/13/13/7030)
Supplement: s1 [file s1]

Reference

[1]  
[2]  
[3]  
[4]  
[5]  
[6]  
[6]  
[7]  
[8]  
[9]  
[10]  
[11]  
[12]  
[13]  
[14]  
[15]  
[16]  
[17]  
[18]  
[19]  
[20]  
[21]  
[19]  
[22]  
[23]  
[24]  
[25]  
[26]  
[27]  
[27]  
[28]  
[29]  
[30]  
[31]  
[32]  
[33]  
[34]  
[35]  
[36]  
[37]  
[38]  
[39]  
[40]  
[41]  
[42]  
[43]  
[44]  
[45]

[46]  
[47]  
[48]  
[49]  
[50]  
[51]  
[52]  
[53]  
[54]  
[55]  
[56]  
[57]  
[58]  
[59]  
[60]  
[61]  
[62]  
[63]  
[64]  
[65]  
[66]  
[67]  
[68]  
[69]  
[70]  
[71]  
[72]  
[73]  
[74]  
[75]  
[76]  
[77]  
[78]  
[79]  
[80]  
[81]  
[82]  
[83]  
[84]  
[85]  
[86]  
[87]  
[88]  
[89]  
[90]  
[91]  
[92]  
[93]  
[94]

[95]  
[96]  
[97]  
[98]  
[99]  
[100]  
[101]  
[102]  
[103]  
[104]  
[105]  
[106]  
[107]  
[108]  
[109]  
[110]  
[111]  
[112]  
[113]  
[114]  
[115]  
[116]  
[117]  
[118]  
[119]  
[120]  
[121]  
[122]  
[123]  
[124]  
[125]  
[126]  
[127]  
[128]  
[129]  
[130]  
[131]  
[132]  
[133]  
[134]  
[135]  
[136]  
[137]  
[138]  
[139]  
[140]  
[141]  
[142]  
[143]

[144]  
[145]  
[146]  
[147]  
[148]  
[149]  
[150]  
[151]  
[152]  
[153]  
[154]  
[155]  
[156]  
[157]  
[158]  
[159]  
[160]  
[161]  
[162]  
[163]  
[164]  
[165]  
[166]  
[167]  
[168]  
[169]  
[170]  
[171]  
[172]  
[173]  
[174]  
[175]  
[176]  
[177]  
[178]  
[179]  
[180]  
[181]  
[182]  
[183]  
[184]  
[185]  
[186]  
[187]  
[188]  
[189]  
[190]  
[191]  
[192]

[193]  
[194]  
[195]  
[196]  
[197]  
[198]  
[199]  
[200]  
[201]  
[202]  
[203]  
[204]  
[205]  
[206]  
[207]  
[208]  
[209]  
[210]  
[211]  
[212]  
[213]  
[214]  
[215]  
[216]  
[217]  
[218]  
[22]  
[219]  
[220]  
[221]  
[222]  
[223]  
[224]  
[225]  
[226]  
[227]  
[228]  
[229]  
[230]  
[231]  
[232]  
[233]  
[234]  
[235]  
[236]  
[237]  
[238]  
[239]  
[240]

[241]  
[242]  
[243]  
[244]  
[245]  
[246]  
[247]  
[248]  
[249]  
[250]  
[251]  
[252]  
[253]  
[254]  
[255]  
[256]  
[257]  
[258]  
[259]  
[260]  
[261]  
[262]  
[263]  
[264]  
[265]  
[266]  
[267]  
[268]  
[269]  
[270]  
[271]

Conservation studies on groundwaters’ pollution:  
challenges and perspectives for stygofauna communities

Raoul Manenti· Beatrice Piazza, Yahui Zaho, Emilio Padoa Schioppa, Enrico Lunghi

**Supplementary Appendix 2**

List of the references used in the Supplementary Table 1

1. Achurra, A.; Rodriguez, P. Syntopy in subterranean fauna: Trophic specialisation in two new species of *Rhyacodrilus* Bretscher, 1901 (Annelida, Clitellata, Rhyacodrilinae). *Zool Anz* **2016**, *261*, 1-11.
2. Achurra, A.; Rodriguez, P.; Erseus, C. Pseudo-cryptic speciation in the subterranean medium: A new species of *Stylodrilus* Claparede, 1862, with a revision of the status of *Bichaeta* Bretscher, 1900 (Annelida, Clitellata, Lumbriculidae). *Zool Anz* **2015**, *257*, 71-86.
3. Allford, A.; Cooper, S.J.B.; Humphreys, W.F.; Austin, A.D. Diversity and distribution of groundwater fauna in a calcrete aquifer: does sampling method influence the story? *Invertebr Syst* **2008**, *22*, 127-138.
4. Apostolov, A. Stygobitic harpacticoid copepods of France. 7. Description of two new copepods of the genus *Parastenocaris* kessler, 1913. *Crustaceana* **2005**, *78*, 95-111.
5. Asmyhr, M.G.; Cooper, S.J.B. Difficulties barcoding in the dark: the case of crustacean stygofauna from eastern Australia. *Invertebr Syst* **2012**, *26*, 583-591.
6. Avramov, M.; Rock, T.M.; Pfister, G.; Schramm, K.W.; Schmidt, S.I.; Griebler, C. Catecholamine levels in groundwater and stream amphipods and their response to temperature stress. *Gen Comp Endocr* **2013**, *194*, 110-117.
7. Baltanas, A.; Namiotko, T.; Danielopol, D.L. Biogeography and disparity within the genus *Cryptocandona* (Crustacea, Ostracoda). *Vie Milieu* **2000**, *50*, 297-310.
8. Bis, B.; Zdanowicz, A.; Zalewski, M. Effects of catchment properties on hydrochemistry, habitat complexity and invertebrate community structure in a lowland river. *Hydrobiologia* **2000**, *422*, 369-387.
9. Bork, J.; Berkhoff, S.E.; Bork, S.; Hahn, H.J. Using subsurface metazoan fauna to indicate groundwater-surface water interactions in the Nakdong River floodplain, South Korea. *Hydrogeol J* **2009**, *17*, 61-75.
10. Bork, J.; Bork, S.; Berkhoff, S.E.; Hahn, H.J. Testing unbaited stygofauna traps for sampling performance. *Limnologia* **2008**, *38*, 105-115.
11. Boulton, A.J.; Dole-Olivier, M.J.; Marmonier, P. Effects of sample volume and taxonomic resolution on assessment of hyporheic assemblage composition sampled using a Bou-Rouch pump. *Arch. fur Hydrobiol.* **2004**, *159*, 327-355.
12. Boutin, C. Stygobiology and Historical Geology - the Age of Fuerteventura (Canary-Island), as Inferred from Its Present Stygofauna. *B Soc Geol Fr* **1994**, *165*, 273-285.
13. Bozkurt, A. Investigation of zooplankton fauna in water wells of Kuyubeli village (Adana, Turkey) with the first record of the genus *Speocyclops* Kiefer, 1937 (Copepoda, Cyclopoida, Cyclopidae) for Turkish inland waters. *Turk J Zool* **2019**, *43*, 142-145.
14. Bradford, T.M.; Adams, M.; Guzik, M.T.; Humphreys, W.F.; Austin, A.D.; Cooper, S.J.B. Patterns of population genetic variation in sympatric chiltoniid amphipods within a calcrete aquifer reveal a dynamic subterranean environment. *Heredity* **2013**, *111*, 77-85.
15. Brancelj, A.; Zibrat, U.; Jamnik, B. Differences between groundwater fauna in shallow and in deep intergranular aquifers as an indication of different characteristics of habitats and hydraulic connections. *J. Limnol.* **2016**, *75*, 248-261.
16. Brown, L.; Finston, T.; Humphreys, G.; Eberhard, S.; Pinder, A. Groundwater oligochaetes show complex genetic patterns of distribution in the Pilbara region of Western Australia. *Invertebr Syst* **2015**, *29*, 405-420.
17. Bruno, M.C.; Reid, J.W.; Perry, S.A. A list and identification key for the freshwater, free-living copepods of Florida (USA). *J Crustacean Biol* **2005**, *25*, 384-400.
18. Buhay, J.E.; Crandall, K.A. Subterranean phylogeography of freshwater crayfishes shows extensive gene flow and surprisingly large population sizes. *Mol. Ecol.* **2005**, *14*, 4259-4273.
19. Camacho, A.I.; Dorda, B.A.; Rey, I. Undisclosed Taxonomic Diversity of Bathynellacea (Malacostraca: Syncarida) in the Iberian Peninsula Revealed by Molecular Data. *J Crustacean Biol* **2012**, *32*, 816-826.
20. Camacho, A.I.; Dorda, B.A.; Rey, I. Old and new taxonomic tools: description of a new genus and two new species of Bathynellidae from Spain with morphological and molecular characters. *J Nat Hist* **2013**, *47*, 1393-1420.

21. Camacho, A.I.; Hancock, P. First record of Syncarida from Queensland, Australia, with description of two new species of Notobathynella Schminke, 1973 (Crustacea, Bathynellacea, Parabathynellidae). *J Nat Hist* **2011**, *45*, 113-135.
22. Camacho, A.I.; Hutchins, B.; Schwartz, B.F.; Dorda, B.A.; Casado, A.; Rey, I. Description of a new genus and species of Bathynellidae (Crustacea: Bathynellacea) from Texas based on morphological and molecular characters. *J Nat Hist* **2018**, *52*, 29-51.
23. Camacho, A.I.; Newell, R.L.; Crete, Z.; Dorda, B.A.; Casado, A.; Rey, I. Northernmost discovery of Bathynellacea (Syncarida: Bathynellidae) with description of a new species of Pacificabathynella from Alaska (USA). *J Nat Hist* **2016**, *50*, 583-602.
24. Camacho, A.I.; Newell, R.L.; Reid, B. New records of Bathynellacea (Syncarida, Bathynellidae) in North America: three new species of the genus Pacificabathynella from Montana, USA. *J Nat Hist* **2009**, *43*, 1805-1834.
25. Camacho, A.I.; Torres, T.; Puch, C.J.; Ortiz, J.E.; Valdecasas, A.G. Small-scale biogeographical patterns in some groundwater Crustacea, the syncarid, Parabathynellidae. *Biodivers. Conserv.* **2006**, *15*, 3527-3541.
26. Chatelliers, M.C.D.; Juget, J.; Lafont, M.; Martin, P. Subterranean aquatic Oligochaeta. *Freshw. Biol.* **2009**, *54*, 678-690.
27. Claret, C.; Marmonier, P.; Dole-Olivier, M.J.; Castella, E. Effects of management works on the interstitial fauna of floodplain aquatic systems (River Rhone, France). *Biodivers. Conserv.* **1999**, *8*, 1179-1204.
28. Cook, B.D.; Abrams, K.M.; Marshall, J.; Perna, C.N.; Choy, S.; Guzik, M.T.; Cooper, S.J.B. Species diversity and genetic differentiation of stygofauna (Syncarida: Bathynellacea) across an alluvial aquifer in north-eastern Australia. *Aust J Zool* **2012**, *60*, 152-158.
29. Cottarelli, V.; Bruno, M.C.; Spena, M.T.; Grasso, R. Studies on Subterranean Copepods from Italy, with Descriptions of Two New Epikarstic Species from a Cave in Sicily. *Zool Stud* **2012**, *51*, 556-582.
30. Curcic, B.P.M. Ayyalonia dimentmani n. g., n. sp (Ayyaloniini n. trib., Chthoniidae, Pseudoscorpiones) from a cave in Israel. *Arch Biol Sci* **2008**, *60*, 331-339.
31. Danielopol, D.L.; Pospisil, P. Hidden biodiversity in the groundwater of the Danube Flood Plain National Park (Austria). *Biodivers Conserv* **2001**, *10*, 1711-1721.
32. Darocha, C.E.F.; Hakenkamp, C.C. New Species of Halicyclops (Copepoda, Cyclopidae) from the United-States-of-America. *Hydrobiologia* **1993**, *259*, 145-156.
33. Di Lorenzo, T.; Cifoni, M.; Lombardo, P.; Fiasca, B.; Galassi, D.M.P. Ammonium threshold values for groundwater quality in the EU may not protect groundwater fauna: evidence from an alluvial aquifer in Italy. *Hydrobiologia* **2015**, *743*, 139-150.
34. Di Lorenzo, T.; Galassi, D.M.P. Effect of Temperature Rising on the Stygobitic Crustacean Species Diacyclops belgicus: Does Global Warming Affect Groundwater Populations? *Water-Sui* **2017**, *9*.
35. Dole-Olivier, M.J. Surface water-groundwater exchanges in three dimensions on a backwater of the Rhone River. *Freshwater Biol* **1998**, *40*, 93-109.
36. Dole-Olivier, M.J.; Malard, F.; Ferreira, D.; Gibert, J. Groundwater biodiversity. *Houille Blanche* **2005**, 39-44.
37. Dole-Olivier, M.J.; Malard, F.; Martin, D.; Lefebure, T.; Gibert, J. Relationships between environmental variables and groundwater biodiversity at the regional scale. *Freshwater Biol* **2009**, *54*, 797-813.
38. Doleolivier, M.J.; Marmonier, P. Patch Distribution of Interstitial Communities - Prevailing Factors. *Freshwater Biol* **1992**, *27*, 177-191.
39. Doleolivier, M.J.; Marmonier, P. Effects of Spates on the Vertical-Distribution of the Interstitial Community. *Hydrobiologia* **1992**, *230*, 49-61.
40. Dumas, P.; Bou, C.; Gibert, J. Groundwater macrocrustaceans as natural indicators of the Ariege alluvial aquifer. *Int Rev Hydrobiol* **2001**, *86*, 619-633.
41. Dumnicka, E.; Galas, J.; Krodkiewska, M. Patterns of Benthic Fauna Distribution in Wells: The Role of Anthropogenic Impact and Geology. *Vadose Zone J* **2017**, *16*.



42. Eberhard, S.M.; Halse, S.A.; Williams, M.R.; Scanlon, M.D.; Cocking, J.; Barron, H.J. Exploring the relationship between sampling efficiency and short-range endemism for groundwater fauna in the Pilbara region, Western Australia. *Freshwater Biol* **2009**, *54*, 885-901.
43. Eisendle-Flockner, U.; Hilberg, S. Hard rock aquifers and free-living nematodes - an interdisciplinary approach based on two widely neglected components in groundwater research. *Ecohydrology* **2015**, *8*, 368-377.
44. Erseus, C. Groundwater and Marine Intertidal Tubificidae (Oligochaeta) from the Canary-Islands and Cabo Verde Islands, with Descriptions of 2 New Species. *Bijdr Dierkd* **1992**, *62*, 63-70.
45. Fenwick, G.D. The freshwater Amphipoda (Crustacea) of New Zealand: a review. *J Roy Soc New Zeal* **2001**, *31*, 341-363.
46. Ferreira, D.; Malard, F.; Dole-Olivier, M.J.; Gibert, J. Obligate groundwater fauna of France: diversity patterns and conservation implications. *Biodivers Conserv* **2007**, *16*, 567-596.
47. Finston, T.L.; Francis, C.J.; Johnson, M.S. Biogeography of the stygobitic isopod *Pygolabis* (Malacostraca: Tainisopidae) in the Pilbara, Western Australia: Evidence for multiple colonisations of the groundwater. *Mol Phylogenet Evol* **2009**, *52*, 448-460.
48. Finston, T.L.; Lukehurst, S.S.; Fitzpatrick, G.L. Characterisation of microsatellite loci in the groundwater amphipod *Chydaekata* sp. (Malacostraca: Paramelitidae). *Conserv Genet Resour* **2010**, *2*, 237-239.
49. Foulquier, A.; Simon, L.; Gilbert, F.; Fourel, F.; Malard, F.; Mermillod-Blondin, F. Relative influences of DOC flux and subterranean fauna on microbial abundance and activity in aquifer sediments: new insights from <sup>13</sup>C-tracer experiments. *Freshwater Biol* **2010**, *55*, 1560-1576.
50. Fowler, R.T.; Scarsbrook, M.R. Influence of hydrologic exchange patterns on water chemistry and hyporheic invertebrate communities in three gravel-bed rivers. *New Zeal J Mar Fresh* **2002**, *36*, 471-482.
51. Fraser, B.G.; Williams, D.D. Seasonal boundary dynamics of a groundwater/surface-water ecotone. *Ecology* **1998**, *79*, 2019-2031.
52. Gabrovsek, F.; Knez, M.; Kogovsek, J.; Mihevc, A.; Mulec, J.; Perne, M.; Petric, M.; Pipan, T.; Prelovsek, M.; Slabe, T., et al. Development challenges in karst regions: sustainable land use planning in the karst of Slovenia. *Carbonate Evaporite* **2011**, *26*, 365-380.
53. Galassi, D.M.P.; Stoch, F.; Brancelj, A. Dissecting copepod diversity at different spatial scales in southern European groundwater. *J Nat Hist* **2013**, *47*, 821-840.
54. Garman, K.M.; Rubelmann, H.; Karlen, D.J.; Wu, T.H.; Garey, J.R. Comparison of an inactive submarine spring with an active nearshore anchialine spring in Florida. *Hydrobiologia* **2011**, *677*, 65-87.
55. Gibert, J.; Marmonier, P.; Vanek, V.; Plenet, S. Hydrological exchange and sediment characteristics in a riverbank: Relationship between heavy metals and invertebrate community structure. *Can J Fish Aquat Sci* **1995**, *52*, 2084-2097.
56. Gibson, L.; Humphreys, W.F.; Harvey, M.; Hyder, B.; Winzer, A. Shedding light on the hidden world of subterranean fauna: A transdisciplinary research approach. *Sci Total Environ* **2019**, *684*, 381-389.
57. Gottstein, S.; Ivkovic, M.; Ternjej, I.; Jalzic, B.; Kerovec, M. Environmental features and crustacean community of anchihaline hypogean waters on the Kornati islands, Croatia. *Mar Ecol-Evol Persp* **2007**, *28*, 24-30.
58. Graillot, D.; Paran, F.; Bornette, G.; Marmonier, P.; Piscart, C.; Cadilhac, L. Coupling groundwater modeling and biological indicators for identifying river/aquifer exchanges. *Springerplus* **2014**, *3*.
59. Graymore, M.; Stagnitti, F.; Allinson, G. Impacts of atrazine in aquatic ecosystems. *Environ Int* **2001**, *26*, 483-495.
60. Griebler, C.; Brielmann, H.; Haberer, C.M.; Kaschuba, S.; Kellermann, C.; Stumpp, C.; Hegler, F.; Kuntz, D.; Walker-Hertkorn, S.; Lueders, T. Potential impacts of geothermal energy use and storage of heat on groundwater quality, biodiversity, and ecosystem processes. *Environ Earth Sci* **2016**, *75*.
61. Griebler, C.; Malard, F.; Lefebure, T. Current developments in groundwater ecology - from biodiversity to ecosystem function and services. *Curr Opin Biotech* **2014**, *27*, 159-167.

62. Griebler, C.; Stein, H.; Kellermann, C.; Berkhoff, S.; Brielmann, H.; Schmidt, S.; Selesi, D.; Steube, C.; Fuchs, A.; Hahn, H.J. Ecological assessment of groundwater ecosystems - Vision or illusion? *Ecol Eng* **2010**, *36*, 1174-1190.
63. Gutjahr, S.; Bork, J.; Schmidt, S.I.; Hahn, H.J. Efficiency of sampling invertebrates in groundwater habitats. *Limnologia* **2013**, *43*, 43-48.
64. Guzik, M.T.; Austin, A.D.; Cooper, S.J.B.; Harvey, M.S.; Humphreys, W.F.; Bradford, T.; Eberhard, S.M.; King, R.A.; Leys, R.; Muirhead, K.A., et al. Is the Australian subterranean fauna uniquely diverse? *Invertebr Syst* **2010**, *24*, 407-418.
65. Guzik, M.T.; Cooper, S.J.B.; Humphreys, W.F.; Ong, S.; Kawakami, T.; Austin, A.D. Evidence for population fragmentation within a subterranean aquatic habitat in the Western Australian desert. *Heredity* **2011**, *107*, 215-230.
66. Hahn, H.J. The GW-Fauna-Index: A first approach to a quantitative ecological assessment of groundwater habitats. *Limnologia* **2006**, *36*, 119-137.
67. Hahn, H.J.; Fuchs, A. Distribution patterns of groundwater communities across aquifer types in south-western Germany. *Freshwater Biol* **2009**, *54*, 848-860.
68. Hahn, H.J.; Matzke, D. A comparison of stygofauna communities inside and outside groundwater bores. *Limnologia* **2005**, *35*, 31-44.
69. Hancock, P.J.; Boulton, A.J. Stygofauna biodiversity and endemism in four alluvial aquifers in eastern Australia. *Invertebr Syst* **2008**, *22*, 117-126.
70. Hancock, P.J.; Boulton, A.J.; Humphreys, W.F. Aquifers and hyporheic zones: Towards an ecological understanding of groundwater. *Hydrogeol J* **2005**, *13*, 98-111.
71. Harvey, M.S.; Rix, M.G.; Framenau, V.W.; Hamilton, Z.R.; Johnson, M.S.; Teale, R.J.; Humphreys, G.; Humphreys, W.F. Protecting the innocent: studying short-range endemic taxa enhances conservation outcomes. *Invertebr Syst* **2011**, *25*, 1-10.
72. Hose, G.C.; Fryirs, K.A.; Bailey, J.; Ashby, N.; White, T.; Stumpp, C. Different depths, different fauna: habitat influences on the distribution of groundwater invertebrates. *Hydrobiologia* **2017**, *797*, 145-157.
73. Hose, G.C.; Symington, K.; Lott, M.J.; Lategan, M.J. The toxicity of arsenic(III), chromium(VI) and zinc to groundwater copepods. *Environ Sci Pollut R* **2016**, *23*, 18704-18713.
74. Humphreys, W.F. *Milyeringa veritas* (Eleotridae), a remarkably versatile cave fish from the arid tropics of northwestern Australia. *Environ Biol Fish* **2001**, *62*, 297-313.
75. Humphreys, W.F. Aquifers: the ultimate groundwater-dependent ecosystems. *Aust J Bot* **2006**, *54*, 115-132.
76. Humphreys, W.F. Rising from Down Under: developments in subterranean biodiversity in Australia from a groundwater fauna perspective. *Invertebr Syst* **2008**, *22*, 85-101.
77. Hutchins, B.; Orndorff, W. Effectiveness and Adequacy of Well Sampling Using Baited Traps for Monitoring the Distribution and Abundance of an Aquatic Subterranean Isopod. *J Cave Karst Stud* **2009**, *71*, 193-203.
78. Hutchins, B.T. The conservation status of Texas groundwater invertebrates. *Biodivers Conserv* **2018**, *27*, 475-501.
79. Hyde, J.; Cooper, S.J.B.; Humphreys, W.F.; Austin, A.D.; Munguia, P. Diversity patterns of subterranean invertebrate fauna in calcretes of the Yilgarn Region, Western Australia. *Mar Freshwater Res* **2018**, *69*, 114-121.
80. Iepure, S.; Feurdean, A.; Badaluta, C.; Nagavciuc, V.; Persoiu, A. Pattern of richness and distribution of groundwater Copepoda (Cyclopoida: Harpacticoida) and Ostracoda in Romania: an evolutionary perspective. *Biol J Linn Soc* **2016**, *119*, 593-608.
81. Iepure, S.; Rasines-Ladero, R.; Meffe, R.; Carreno, F.; Mostaza, D.; Sundberg, A.; Di Lorenzo, T.; Barroso, J.L. Exploring the distribution of groundwater Crustacea (Copepoda and Ostracoda) to disentangle aquifer type features A case study in the upper Tajo basin (Central Spain). *Ecohydrology* **2017**, *10*.
82. Issartel, J.; Voituron, Y.; Guillaume, O.; Clobert, J.; Hervant, F. Selection of physiological and metabolic adaptations to food deprivation in the Pyrenean newt *Calotriton asper* during cave colonisation. *Comp Biochem Phys A* **2010**, *155*, 77-83.

83. Javidkar, M.; Cooper, S.J.B.; Humphreys, W.F.; King, R.A.; Judd, S.; Austin, A.D. Biogeographic history of subterranean isopods from groundwater calcrete islands in Western Australia. *Zool Scr* **2018**, *47*, 206-220.
84. Javidkar, M.; Cooper, S.J.B.; King, R.A.; Humphreys, W.F.; Bertozzi, T.; Stevens, M.I.; Austin, A.D. Molecular systematics and biodiversity of oniscidean isopods in the groundwater calcretes of central Western Australia. *Mol Phylogenet Evol* **2016**, *104*, 83-98.
85. Javidkar, M.; King, R.A.; Cooper, S.J.B.; Humphreys, W.F.; Austin, A.D. Taxonomy of Paraplatyarthus Javidkar and King (Isopoda: Oniscidea: Paraplatyarthridae) with description of five new species from Western Australia, and comments on Australian Trichorhina Budde-Lunde, 1908 (Platyarthridae). *Zootaxa* **2017**, *4243*, 401-431.
86. Karanovic, I.; McKay, K. Two new species of Leicacandona Karanovic (Ostracoda, Candoninae) from the Great Sandy Desert, Australia. *J Nat Hist* **2010**, *44*, 2715-2736.
87. Karanovic, T.; Cooper, S.J.B. Molecular and morphological evidence for short range endemism in the Kinnecaris solitaria complex (Copepoda: Parastenocarididae), with descriptions of seven new species. *Zootaxa* **2011**, 1-64.
88. Karanovic, T.; Cooper, S.J.B. Explosive radiation of the genus Schizopera on a small subterranean island in Western Australia (Copepoda : Harpacticoida): unravelling the cases of cryptic speciation, size differentiation and multiple invasions. *Invertebr Syst* **2012**, *26*, 115-192.
89. Karanovic, T.; Eberhard, S.; Cooper, S.J.B.; Guzik, M.T. Morphological and molecular study of the genus Nitokra (Crustacea, Copepoda, Harpacticoida) in a small palaeochannel in Western Australia. *Org Divers Evol* **2015**, *15*, 65-99.
90. Karanovic, T.; Eberhard, S.M.; Murdoch, A. A Cladistic Analysis and Taxonomic Revision of Australian Metacyclops and Goniocyclops, with Description of Four New Species and Three New Genera (Copepoda, Cyclopoida). *Crustaceana* **2011**, *84*, 1-67.
91. Karanovic, T.; Eberhard, S.M.; Perina, G.; Callan, S. Two new subterranean ameirids (Crustacea : Copepoda : Harpacticoida) expose weaknesses in the conservation of short-range endemics threatened by mining developments in Western Australia. *Invertebr Syst* **2013**, *27*, 540-566.
92. Karanovic, T.; Krajicek, M. First Molecular Data on the Western Australian Diacyclops (Copepoda, Cyclopoida) Confirm Morpho-Species but Question Size Differentiation and Monophyly of the Alticola-Group. *Crustaceana* **2012**, *85*, 1549-1569.
93. Khebiza, M.Y.; Boughrou, A.A.; Gabbanini, C.; Messouli, M.; Messina, G. Impact of waste discharges on the water quality and interstitial community structure of two Mediterranean rivers. *Ital J Zool* **2006**, *73*, 153-166.
94. Kibichii, S.; Feeley, H.B.; Baars, J.R.; Kelly-Quinn, M. The influence of water quality on hyporheic invertebrate communities in agricultural catchments. *Mar Freshwater Res* **2015**, *66*, 805-814.
95. King, R.A.; Bradford, T.; Austin, A.D.; Humphreys, W.F.; Cooper, S.J.B. Divergent Molecular Lineages and Not-So-Cryptic Species: The First Descriptions of Stygobitic Chiltoniid Amphipods (Talitroidea: Chiltoniidae) from Western Australia. *J Crustacean Biol* **2012**, *32*, 465-488.
96. Konec, M.; Delic, T.; Trontelj, P. DNA barcoding sheds light on hidden subterranean boundary between Adriatic and Danubian drainage basins. *Ecohydrology* **2016**, *9*, 1304-1312.
97. Korb, K.; Chariton, A.; Stephenson, S.; Greenfield, P.; Hose, G.C. Wells provide a distorted view of life in the aquifer: implications for sampling, monitoring and assessment of groundwater ecosystems. *Sci Rep-Uk* **2017**, *7*.
98. Korb, K.L.; Stephenson, S.; Hose, G.C. Sediment size influences habitat selection and use by groundwater macrofauna and meiofauna. *Aquat Sci* **2019**, *81*.
99. Kulkotyluoglu, O.; Yavuzatmaca, M.; Akdemir, D.; Schwartz, B.F.; Hutchins, B.T. Ufocandona hannaleeae gen. et sp nov (Crustacea, Ostracoda) from an artesian well in Texas, USA. *Eur J Taxon* **2017**, 372.
100. Lafont, M.; Vivier, A. Oligochaete assemblages in the hyporheic zone and coarse surface sediments: Their importance for understanding of ecological functioning of watercourses. *Hydrobiologia* **2006**, *564*, 171-181.
101. Lafont, M.; Vivier, A.; Nogueira, S.; Namour, P.; Breil, P. Surface and hyporheic oligochaete assemblages in a French suburban stream. *Hydrobiologia* **2006**, *564*, 183-193.

102. Lagnika, M.; Ibikounle, M.; Boutin, C.; Sakiti, N.G. Groundwater biodiversity and water quality of wells in the Southern region of Benin. *Cr Chim* **2016**, *19*, 798-806.
103. Leijds, R.; Bloechl, A.; Koenemann, S. Bogidiella Veneris, a New Species of Subterranean Amphipoda (Bogidiellidae) from Australia, with Remarks on the Systematics and Biogeography. *J Crustacean Biol* **2011**, *31*, 566-575.
104. Little, J.; Schmidt, D.J.; Cook, B.D.; Page, T.J.; Hughes, J.M. Diversity and phylogeny of south-east Queensland Bathynellacea. *Aust J Zool* **2016**, *64*, 36-47.
105. Liu, W.; Zhou, C.Y.; Burnet, J.E.; Brancelj, A. The effect of hydrological and hydrochemical parameters on the microdistribution of aquatic fauna in drip water in the Velika Pasica Cave, Central Slovenia. *Ecohydrology* **2017**, *10*.
106. Mahi, A.; Di Lorenzo, T.; Haicha, B.; Belaidi, N.; Taleb, A. Environmental factors determining regional biodiversity patterns of groundwater fauna in semi-arid aquifers of northwest Algeria. *Limnology* **2019**, *20*, 309-320.
107. Malard, F.; Capderrey, C.; Churchward, B.; Eme, D.; Kaufmann, B.; Konecny-Dupre, L.; Lena, J.P.; Liebault, F.; Douady, C.J. Geomorphic influence on intraspecific genetic differentiation and diversity along hyporheic corridors. *Freshwater Biol* **2017**, *62*, 1955-1970.
108. Malard, F.; Ferreira, D.; Doledéc, S.; Ward, J.V. Influence of groundwater upwelling on the distribution of the hyporheos in a headwater river flood plain. *Arch Hydrobiol* **2003**, *157*, 89-116.
109. Malard, F.; Galassi, D.; Lafont, M.; Doledéc, S.; Ward, J.V. Longitudinal patterns of invertebrates in the hyporheic zone of a glacial river. *Freshwater Biol* **2003**, *48*, 1709-1725.
110. Mammola, S.; Leroy, B. Applying species distribution models to caves and other subterranean habitats. *Ecography* **2018**, *41*, 1194-1208.
111. Marmonier, P.; Maazouzi, C.; Foulquier, A.; Navel, S.; Francois, C.; Hervant, F.; Mermillod-Blondin, F.; Vieney, A.; Barraud, S.; Togola, A., et al. The use of crustaceans as sentinel organisms to evaluate groundwater ecological quality. *Ecol Eng* **2013**, *57*, 118-132.
112. Marmonier, P.; Olivier, M.J.; des Chatelliers, M.C.D.; Paran, F.; Graillot, D.; Winiarski, T.; Konecny-Dupre, L.; Navel, S.; Cadilhac, L. Does spatial heterogeneity of hyporheic fauna vary similarly with natural and artificial changes in braided river width? *Sci Total Environ* **2019**, *689*, 57-69.
113. Martin, P.; De Broyer, C.; Fiers, F.; Michel, G.; Sablon, R.; Wouters, K. Biodiversity of Belgian groundwater fauna in relation to environmental conditions. *Freshwater Biol* **2009**, *54*, 814-829.
114. Meleg, I.N.; Battaes, K.P.; Fiers, F.; Moldovan, O.T. Contrasting copepod community dynamics related to sampling strategies in the unsaturated zone of a karst aquifer. *Aquat Ecol* **2015**, *49*, 549-560.
115. Meleg, I.N.; Moldovan, O.T.; Iepure, S.; Fiers, F.; Brad, T. Diversity patterns of fauna in dripping water of caves from Transylvania. *Ann Limnol-Int J Lim* **2011**, *47*, 185-197.
116. Mermillod-Blondin, F.; Des Chatelliers, M.C.; Marmonier, P.; Dole-Olivier, M.J. Distribution of solutes, microbes and invertebrates in river sediments along a riffle-pool-riffle sequence. *Freshwater Biol* **2000**, *44*, 255-269.
117. Mermillod-Blondin, F.; Winiarski, T.; Foulquier, A.; Perrissin, A.; Marmonier, P. Links between sediment structures and ecological processes in the hyporheic zone: ground-penetrating radar as a non-invasive tool to detect subsurface biologically active zones. *Ecohydrology* **2015**, *8*, 626-641.
118. Michel, G.; Malard, F.; Deharveng, L.; Di Lorenzo, T.; Sket, B.; De Broyer, C. Reserve selection for conserving groundwater biodiversity. *Freshwater Biol* **2009**, *54*, 861-876.
119. Mokany, K.; Harwood, T.D.; Halse, S.A.; Ferrier, S. Riddles in the dark: Assessing diversity patterns for cryptic subterranean fauna of the Pilbara. *Divers Distrib* **2019**, *25*, 240-254.
120. Moldovan, O.T.; Constantin, S.; Cheval, S. Drip heterogeneity and the impact of decreased flow rates on the vadose zone fauna in Ciur-Izbuc Cave, NW Romania. *Ecohydrology* **2018**, *11*.
121. Moldovan, O.T.; Meleg, I.N.; Levei, E.A.; Terente, M. A simple method for assessing biotic indicators and predicting biodiversity in the hyporheic zone of a river polluted with metals. *Ecol Indic* **2013**, *24*, 412-420.
122. Moritsch, M.M.; Pakes, M.J.; Lindberg, D.R. How might sea level change affect arthropod biodiversity in anchialine caves: a comparison of Remipedia and Atyidae taxa (Arthropoda: Altocrustacea). *Org Divers Evol* **2014**, *14*, 225-235.

123. Mugnai, R.; Messina, G.; Di Lorenzo, T. The hyporheic zone and its functions: revision and research status in Neotropical regions. *Braz J Biol* **2015**, *75*, 524-534.
124. Murphy, N.P.; Guzik, M.T.; Wilmer, J.W. The influence of landscape on population structure of four invertebrates in groundwater springs. *Freshwater Biol* **2010**, *55*, 2499-2509.
125. Nakano, T.; Tomikawa, K. Reassessment of the Groundwater Amphipod *Paramoera relicta* Synonymizes the Genus *Relictomoera* with *Paramoera* (Crustacea: Amphipoda: Pontogeneiidae). *Zool Sci* **2018**, *35*, 459-467.
126. Niemiller, M.L.; Graening, G.O.; Fenolio, D.B.; Godwin, J.C.; Cooley, J.R.; Pearson, W.D.; Fitzpatrick, B.M.; Near, T.J. Doomed before they are described? The need for conservation assessments of cryptic species complexes using an amblyopsid cavefish (Amblyopsidae: Typhlichthys) as a case study. *Biodivers Conserv* **2013**, *22*, 1799-1820.
127. Olafsdottir, J.H.; Thorbjornsson, J.G.; Kristjansson, B.K.; Olafsson, J.S. Invertebrate biodiversity in cold groundwater fissures in Iceland. *Ecol Evol* **2019**, *9*, 6399-6409.
128. Olsen, D.A.; Townsend, C.R. Hyporheic community composition in a gravel-bed stream: influence of vertical hydrological exchange, sediment structure and physicochemistry. *Freshwater Biol* **2003**, *48*, 1363-1378.
129. Pacioglu, O.; Moldovan, O.T. Response of invertebrates from the hyporheic zone of chalk rivers to eutrophication and land use. *Environ Sci Pollut R* **2016**, *23*, 4729-4740.
130. Peralta, M. A new stygobitic species of Stygocarididae (Crustacea: Anaspidacea) from South America. *Zootaxa* **2014**, *3760*, 396-408.
131. Perina, G.; Camacho, A.I.; Huey, J.; Horwitz, P.; Koenders, A. Understanding subterranean variability: the first genus of Bathynellidae (Bathynellacea, Crustacea) from Western Australia described through a morphological and multigene approach. *Invertebr Syst* **2018**, *32*, 423-447.
132. Perina, G.; Camacho, A.I.; Huey, J.; Horwitz, P.; Koenders, A. The role of allopatric speciation and ancient origins of Bathynellidae (Crustacea) in the Pilbara (Western Australia): two new genera from the De Grey River catchment. *Contrib Zool* **2019**, *88*, 452-497.
133. Perina, G.; Camacho, A.I.; Huey, J.; Horwitz, P.; Koenders, A. New Bathynellidae (Crustacea) taxa and their relationships in the Fortescue catchment aquifers of the Pilbara region, Western Australia. *Syst Biodivers* **2019**, *17*, 148-164.
134. Pfister, G.; Rieb, J.; Avramov, M.; Rock, T.; Griebler, C.; Schramm, K.W. Detection of catecholamines in single specimens of groundwater amphipods. *Anal Bioanal Chem* **2013**, *405*, 5571-5582.
135. Pinder, A.M.; Eberhard, S.M.; Humphreys, W.F. New phallodrilines (Annelida : Clitellata : Tubificidae) from Western Australian groundwater. *Zootaxa* **2006**, *31*, 48.
136. Reboleira, A.S.P.S.; Abrantes, N.; Oromi, P.; Goncalves, F. Acute Toxicity of Copper Sulfate and Potassium Dichromate on Stygobiont *Proasellus*: General Aspects of Groundwater Ecotoxicology and Future Perspectives. *Water Air Soil Poll* **2013**, *224*.
137. Reboleira, A.S.P.S.; Borges, P.A.V.; Goncalves, F.; Serrano, A.R.M.; Oromi, P. The subterranean fauna of a biodiversity hotspot region - Portugal: an overview and its conservation. *Int J Speleol* **2011**, *40*, 23-37.
138. Reddy, Y.R.; Totakura, V.R.; Shaik, S. A new genus and two new species of Parastenocarididae (Copepoda: Harpacticoida) from southeastern India. *J Nat Hist* **2016**, *50*, 1315-1356.
139. Reeves, J.M.; De Deckker, P.; Halse, S.A. Groundwater Ostracods from the arid Pilbara region of northwestern Australia: distribution and water chemistry. *Hydrobiologia* **2007**, *585*, 99-118.
140. Ribera, I.; Reboleira, A.S.P.S. The first stygobiont species of Coleoptera from Portugal, with a molecular phylogeny of the Siettitia group of genera (Dytiscidae, Hydroporinae, Hydroporini, Siettitia). *Zookeys* **2019**, *21*, 38.
141. Ruffo, S.; Vonk, R. *Ingolfiella beatricis*, new species (Amphipoda : Ingolfiellidae) from subterranean waters of Slovenia. *J Crustacean Biol* **2001**, *21*, 484-491.
142. Sarkka, J.; Makela, J. Meiofauna of esker groundwaters in Finland. *Hydrobiologia* **1999**, *405*, 25-37.
143. Scarsbrook, M.R.; Fenwick, G.D. Preliminary assessment of crustacean distribution patterns in New Zealand groundwater aquifers. *New Zeal J Mar Fresh* **2003**, *37*, 405-413.
144. Scarsbrook, M.R.; Halliday, J. Detecting patterns in hyporheic community structure: does sampling method alter the story? *New Zeal J Mar Fresh* **2002**, *36*.

145. Schenkova, J.; Paril, P.; Petrivalska, K.; Bojkova, J. Aquatic oligochaetes (Annelida: Clitellata) of the Czech Republic: check-list, new records, and ecological remarks. *Zootaxa* **2010**, 29-44.
146. Schmidt, S.I.; Hahn, H.J. What is groundwater and what does this mean to fauna? - An opinion. *Limnologica* **2012**, 42, 1-6.
147. Schmidt, S.I.; Hahn, H.J.; Watson, G.D.; Woodbury, R.J.; Hatton, T.J. Sampling fauna in stream sediments as well as groundwater using one net sampler. *Acta Hydroch Hydrob* **2004**, 32, 131-137.
148. Schmidt, S.I.; Hellweg, J.; Hahn, H.J.; Hatton, T.J.; Humphreys, W.F. Does groundwater influence the sediment fauna beneath a small, sandy stream? *Limnologica* **2007**, 37, 208-225.
149. Schminke, H.K. First Report of Groundwater Fauna from Papua New Guinea: Kinnecaris Jakobi, 1972 Redefined (Copepoda, Harpacticoida, Parastenocarididae), and Description of a New Species. *Crustaceana* **2008**, 81, 1241-1253.
150. Sorensen, J.P.R.; Maurice, L.; Edwards, F.K.; Lapworth, D.J.; Read, D.S.; Allen, D.; Butcher, A.S.; Newbold, L.K.; Townsend, B.R.; Williams, P.J. Using Boreholes as Windows into Groundwater Ecosystems. *Plos One* **2013**, 8.
151. Stein, H.; Griebler, C.; Berkhoff, S.; Matzke, D.; Fuchs, A.; Hahn, H.J. Stygoregions - a promising approach to a bioregional classification of groundwater systems. *Sci Rep-Uk* **2012**, 2.
152. Stein, H.; Kellermann, C.; Schmidt, S.I.; Briellmann, H.; Steube, C.; Berkhoff, S.E.; Fuchs, A.; Hahn, H.J.; Thulin, B.; Griebler, C. The potential use of fauna and bacteria as ecological indicators for the assessment of groundwater quality. *J Environ Monitor* **2010**, 12, 242-254.
153. Stoch, F.; Galassi, D.M.P. Stygobiotic crustacean species richness: a question of numbers, a matter of scale. *Hydrobiologia* **2010**, 653, 217-234.
154. Stock, J.H. Biogeographic Synthesis of the Insular Groundwater Faunas of the (Sub)Tropical Atlantic. *Hydrobiologia* **1994**, 287, 105-117.
155. Stumpp, C.; Hose, G.C. The Impact of Water Table Drawdown and Drying on Subterranean Aquatic Fauna in In-Vitro Experiments. *Plos One* **2013**, 8.
156. Tomikawa, K.; Nakano, T. Two new subterranean species of Pseudocrangonyx Akatsuka & Komai, 1922 (Amphipoda: Crangonyctoidea: Pseudocrangonyctidae), with an insight into groundwater faunal relationships in western Japan. *J Crustacean Biol* **2018**, 38, 460-474.
157. White, J.C.; House, A.; Punchard, N.; Hannah, D.M.; Wilding, N.A.; Wood, P.J. Macroinvertebrate community responses to hydrological controls and groundwater abstraction effects across intermittent and perennial headwater streams. *Sci Total Environ* **2018**, 610, 1514-1526.
158. Williams, D.D. The brackishwater hyporheic zone: invertebrate community structure across a novel ecotone. *Hydrobiologia* **2003**, 510, 153-173.
159. Wood, P.J.; Armitage, P.D. The response of the macroinvertebrate community to low-flow variability and supra-seasonal drought within a groundwater dominated stream. *Arch Hydrobiol* **2004**, 161, 1-20.
160. Wood, P.J.; Gunn, J.; Smith, H.; Abas-Kutty, A. Flow permanence and macroinvertebrate community diversity within groundwater dominated headwater streams and springs. *Hydrobiologia* **2005**, 545, 55-64.
161. Yao, J.M.; Sanchez-Perez, J.M.; Sauvage, S.; Teissier, S.; Attard, E.; Lauga, B.; Duran, R.; Julien, F.; Bernard-Jannin, L.; Ramburn, H., et al. Biodiversity and ecosystem purification service in an alluvial wetland. *Ecol Eng* **2017**, 103, 359-371.
162. Zagmajster, M.; Culver, D.C.; Christman, M.C.; Sket, B. Evaluating the sampling bias in pattern of subterranean species richness: combining approaches. *Biodivers Conserv* **2010**, 19, 3035-3048.
163. Bottazzi, E.; Bruno, M.C.; Pieri, V.; Di Sabatino, A.; Silveri, L.; Carolli, M.; Rossetti, G. Spatial and seasonal distribution of invertebrates in Northern Apennine rheocene springs. *J Limnol* **2011**, 70, 77-92.
164. Clements, A.R.; Suter, P.J.; Fussell, M.; Silvester, E. Macroinvertebrate communities in spring-fed alpine source pools. *Hydrobiologia* **2016**, 777, 119-138.
165. Culver, D.C.; Pipan, T. Redefining the extent of the aquatic subterranean biotope-shallow subterranean habitats. *Ecohydrology* **2011**, 4, 721-730.

166. Di Lorenzo, T.; Cipriani, D.; Fiasca, B.; Rusi, S.; Galassi, D.M.P. Groundwater drift monitoring as a tool to assess the spatial distribution of groundwater species into karst aquifers. *Hydrobiologia* **2018**, *813*, 137-156.
167. Dole-Olivier, M.J.; Maazouzi, C.; Cellot, B.; Fiers, F.; Galassi, D.M.P.; Claret, C.; Martin, D.; Merigoux, S.; Marmonier, P. Assessing invertebrate assemblages in the subsurface zone of stream sediments (0-15 cm deep) using a hyporheic sampler. *Water Resour Res* **2014**, *50*, 453-465.
168. Guy-Haim, T.; Simon-Blecher, N.; Frumkin, A.; Naaman, I.; Achituv, Y. Multiple transgressions and slow evolution shape the phylogeographic pattern of the blind cave-dwelling shrimp *Typhlocaris*. *PeerJ* **2018**, *6*.
169. Jaume, D. Global diversity of spelaegriphaceans & thermosbaenaceans (Crustacea; Spelaegriphacea & Thermosbaenacea) in freshwater. *Hydrobiologia* **2008**, *595*, 219-224.
170. Maurice, L.; Robertson, A.R.; White, D.; Knight, L.; Johns, T.; Edwards, F.; Arietti, M.; Sorensen, J.P.R.; Weitowitz, D.; Marchant, B.P., et al. The invertebrate ecology of the Chalk aquifer in England (UK). *Hydrogeol J* **2016**, *24*, 459-474.
171. Mori, N.; Kanduc, T.; Opalicki Slabe, M.; Brancelj, A. Groundwater Drift as a Tracer for Identifying Sources of Spring Discharge. *Groundwater* **2015**, *53*, 123-132.
172. Murphy, N.P.; Adams, M.; Austin, A.D. Independent colonization and extensive cryptic speciation of freshwater amphipods in the isolated groundwater springs of Australia's Great Artesian Basin. *Mol Ecol* **2009**, *18*, 109-122.
173. Pipan, T.; Fiser, C.; Novak, T.; Culver, D.C. Fifty Years of the Hypotelmiorheic: What Have We Learned? *Acta Carsologica* **2012**, *41*, 275-285.
174. Sidorov, D.A.; Gontcharov, A.A. Studies on subterranean amphipod crustaceans of Primory, Russia. Part 1. Three new species of the genus *Pseudocrangonyx* from springs and other groundwater habitats in far eastern Russia. *Zootaxa* **2013**, *3693*, 547-567.
175. Strayer, D.L.; May, S.E.; Nielsen, P.; Wollheim, W.; Hausam, S. An Endemic Groundwater Fauna in Unglaciaded Eastern North-America. *Can J Zool* **1995**, *73*, 502-508.
176. Ring, R.A. The Insect Fauna and Some Other Characteristics of Natural Salt Springs on Saltspring Island, British-Columbia. *Mem Entomol Soc Can* **1991**, 51-61.
177. Rossetti, G.; Pieri, V.; Martens, K. Recent ostracods (Crustacea, Ostracoda) found in lowland springs of the provinces of Piacenza and Parma (Northern Italy). *Hydrobiologia* **2005**, *542*, 287-296.
178. Boughrou, A.A.; Khebiza, M.Y.; Boulanouar, M.; Boutin, C.; Messana, G. Groundwater quality in two arid areas of Morocco: Impact of pollution on biodiversity and paleogeographic implications. *Environ Technol* **2007**, *28*, 1299-1315.
179. Bradford, T.; Adams, M.; Humphreys, W.F.; Austin, A.D.; Cooper, S.J.B. DNA barcoding of stygofauna uncovers cryptic amphipod diversity in a calcrete aquifer in Western Australia's arid zone. *Mol Ecol Resour* **2010**, *10*, 41-50.
180. Di Lorenzo, T.; Galassi, D.M.P. Agricultural impact on Mediterranean alluvial aquifers: do groundwater communities respond? *Fund Appl Limnol* **2013**, *182*, 271-282.
181. Dumas, P. Stability of interstitial crustacean communities in an isolated alluvial aquifer. *Hydrobiologia* **2002**, *468*, 63-76.
182. Dumas, P. Irrigation as a disturbance for interstitial crustacean communities in a French Pyrenean alluvial aquifer. *Ann Limnol-Int J Lim* **2004**, *40*, 139-147.
183. Engel, A.S. Observations on the biodiversity of sulfidic karst habitats. *J Cave Karst Stud* **2007**, *69*, 187-206.
184. Hancock, P.J.; Boulton, A.J. Sampling groundwater fauna: efficiency of rapid assessment methods tested in bores in eastern Australia. *Freshwater Biol* **2009**, *54*, 902-917.
185. Kaser, D. A new habitat of subsurface waters: the hyporheic biotope. *Fund Appl Limnol* **2010**, *176*, 291-302.
186. Malard, F.; Boutin, C.; Camacho, A.I.; Ferreira, D.; Michel, G.; Sket, B.; Stoch, F. Diversity patterns of stygobiotic crustaceans across multiple spatial scales in Europe. *Freshwater Biol* **2009**, *54*, 756-776.
187. Malard, F.; Mathieu, J.; Reygrobellet, J.L.; Lafont, M. Biomonitoring groundwater contamination: Application to a karst area in Southern France. *Aquat Sci* **1996**, *58*, 158-187.

188. Marmonier, P.; Claret, C.; Dole-Olivier, M.J. Interstitial fauna in newly-created floodplain canals of a large regulated river. *Regul River* **2000**, *16*, 23-36.
189. Meleg, I.N.; Fiers, F.; Robu, M.; Moldovan, O.T. Distribution patterns of subsurface copepods and the impact of environmental parameters. *Limnologica* **2012**, *42*, 156-164.
190. Meleg, I.N.; Naparus, M.; Fiers, F.; Meleg, I.H.; Vlaicu, M.; Moldovan, O.T. The relationships between land cover, climate and cave copepod spatial distribution and suitability along the Carpathians. *Environ Conserv* **2014**, *41*, 206-216.
191. Moldovan, O.T.; Meleg, I.N.; Persoiu, A. Habitat fragmentation and its effects on groundwater populations. *Ecohydrology* **2012**, *5*, 445-452.
192. Nkemegni, G.N.; Togouet, S.H.Z.; Fomena, A.; Pountougnigni, O.F.; Piscart, C. Aquatic invertebrate fauna of wells in a tropical mountain climate, western Cameroon. *Afr J Aquat Sci* **2015**, *40*, 393-401.
193. Omesova, M.; Helesic, J. Organic matter and fine grains as possible determinants of spatial and seasonal variability in bed sediment fauna: A case study from a Hercynian gravel stream. *Limnologica* **2010**, *40*, 307-314.
194. Page, T.J.; Humphreys, W.F.; Hughes, J.M. Shrimps Down Under: Evolutionary Relationships of Subterranean Crustaceans from Western Australia (Decapoda: Atyidae: Stygiocarids). *Plos One* **2008**, *3*.
195. Victor, R.; Al-Farsi, A.A.I. Water quality and invertebrate fauna of farm wells in an area affected by salinization in Oman. *J Arid Environ* **2001**, *48*, 419-428.
196. Ward, J.V.; Bretschko, G.; Brunke, M.; Danielopol, D.; Gibert, J.; Gonser, T.; Hildrew, A.G. The boundaries of river systems: the metazoan perspective. *Freshwater Biol* **1998**, *40*, 531-569.
197. Wood, P.J.; Gunn, J.; Perkins, J. The impact of pollution on aquatic invertebrates within a subterranean ecosystem - out of sight out of mind. *Arch Hydrobiol* **2002**, *155*, 223-237.
198. Wood, P.J.; Gunn, J.; Rundle, S.D. Response of benthic cave invertebrates to organic pollution events. *Aquat Conserv* **2008**, *18*, 909-922.
199. Dole-Olivier, M.J.; Galassi, D.M.P.; Fiers, F.; Malard, F.; Martin, P.; Martin, D.; Marmonier, P. Biodiversity in mountain groundwater: the Mercantour National Park (France) as a European hotspot. *Zoosystema* **2015**, *37*, 529-550.
200. Humphreys, W.F. Subterranean fauna of Christmas Island: habitats and salient features. *Raffles B Zool* **2014**, 29-44.
201. Martin, P.; Schmelz, R.M.; Dole-Olivier, M.J. Groundwater oligochaetes (Annelida, Clitellata) from the Mercantour National Park (France), with the descriptions of one new genus and two new stygobiont species. *Zoosystema* **2015**, *37*, 551-569.
202. Dole-Olivier, M.J.; Castellarini, F.; Coineau, N.; Galassi, D.M.P.; Martin, P.; Mori, N.; Valdecasas, A.; Gibert, J. Towards an optimal sampling strategy to assess groundwater biodiversity: comparison across six European regions. *Freshwater Biol* **2009**, *54*, 777-796.
203. MacKay, S.E.; Williams, D.D. Invertebrate colonization of the surface and deep groundwaters of a small oceanic island (Barbados, West Indies). *Trop Zool* **2011**, *24*, 1-47.
204. Mencia, A.; Korb, K.L.; Hose, G.C. River-aquifer interactions and their relationship to stygofauna assemblages: A case study of the Gwydir River alluvial aquifer (New South Wales, Australia). *Sci Total Environ* **2014**, *479*, 292-305.
205. Moldovan, O.T.; Levei, E.A. Temporal variability of fauna and the importance of sampling frequency in the hyporheic zone. *Hydrobiologia* **2015**, *755*, 27-38.
206. Moldovan, O.T.; Levei, E.A.; Marin, C.; Banciu, M.; Banciu, H.L.; Pavelescu, C.; Brad, T.; Cimpean, M.; Meleg, I.; Iepure, S., et al. Spatial distribution patterns of the hyporheic invertebrate communities in a polluted river in Romania. *Hydrobiologia* **2011**, *669*, 63-82.
207. Notenboom, J.; Serrano, R.; Morell, I.; Hernandez, F. The Phreatic Aquifer of the Plana De Castellon (Spain) - Relationships between Animal Assemblages and Groundwater Pollution. *Hydrobiologia* **1995**, *297*, 241-249.
208. Rabelo, L.M.; Souza-Silva, M.; Ferreira, R.L. Priority caves for biodiversity conservation in a key karst area of Brazil: comparing the applicability of cave conservation indices. *Biodivers Conserv* **2018**, *27*, 2097-2129.



209. Rasines-Ladero, R.; Iepure, S. Parent lithology and organic matter influence the hyporheic biota of two Mediterranean rivers in central Spain. *Limnetica* **2016**, *35*, 19-36.
210. Shapouri, M.; da Fonseca, L.C.; Iepure, S.; Stigter, T.; Ribeiro, L.; Silva, A. The variation of stygofauna along a gradient of salinization in a coastal aquifer. *Hydrol Res* **2016**, *47*, 89-103.
211. Schmidt, S.I.; Hahn, H.J.; Hatton, T.J.; Humphreys, W.F. Do faunal assemblages reflect the exchange intensity in groundwater zones? *Hydrobiologia* **2007**, *583*, 1-19.
212. Abrams, K.M.; Guzik, M.T.; Cooper, S.J.B.; Humphreys, W.F.; King, R.A.; Cho, J.L.; Austin, A.D. What lies beneath: Molecular phylogenetics and ancestral state reconstruction of the ancient subterranean Australian Parabathynellidae (Syncarida, Crustacea). *Mol Phylogenet Evol* **2012**, *64*, 130-144.
213. Abrams, K.M.; King, R.A.; Guzik, M.T.; Cooper, S.J.B.; Austin, A.D. Molecular phylogenetic, morphological and biogeographic evidence for a new genus of parabathynellid crustaceans (Syncarida : Bathynellacea) from groundwater in an ancient southern Australian landscape. *Invertebr Syst* **2013**, *27*, 146-172.
214. Bednar, J.P.; Trobej, M.; Schagerl, M.; Waringer, J. Which factors shape macrozoobenthic communities in tufa springs? Results from Austrian meteogene travertine-depositing sites. *Hydrobiologia* **2017**, *799*, 293-307.
215. Brancelj, A.; Boonyanusith, C.; Watirogram, S.; Sanoamuang, L.O. The groundwater-dwelling fauna of South East Asia. *J Limnol* **2013**, *72*, 327-343.
216. Brancelj, A.; Dumont, H.J. A review of the diversity, adaptations and groundwater colonization pathways in Cladocera and Calanoida (Crustacea), two rare and contrasting groups of stygobionts. *Fund Appl Limnol* **2007**, *168*, 3-17.
217. Camacho, A.I.; Dorda, B.A.; Chillon, B.S.; Rey, I. The collection of Bathynellacea specimens of MNCN (CSIC) Madrid: microscope slices and DNA extract. *Zookeys* **2017**, 31-63.
218. Camacho, A.I.; Dorda, B.A.; Rey, I. Iberian Peninsula and Balearic Island Bathynellacea (Crustacea, Syncarida) database. *Zookeys* **2014**, 1-20.
219. Camacho, A.I.; Mas-Peinado, P.; Dorda, B.A.; Casado, A.; Brancelj, A.; Knight, L.R.F.D.; Hutchins, B.; Bou, C.; Perina, G.; Rey, I. Molecular tools unveil an underestimated diversity in a stygofauna family: a preliminary world phylogeny and an updated morphology of Bathynellidae (Crustacea: Bathynellacea). *Zool J Linn Soc-Lond* **2018**, *183*, 70-96.
220. Ercoli, F.; Lefebvre, F.; Delangle, M.; Gode, N.; Caillon, M.; Raimond, R.; Souty-Grosset, C. Differing trophic niches of three French stygobionts and their implications for conservation of endemic stygofauna. *Aquat Conserv* **2019**.
221. Fenolio, D.B.; Niemiller, M.L.; Gluesenkamp, A.G.; McKee, A.M.; Taylor, S.J. New Distributional Records of the Stygobitic Crayfish *Cambarus cryptodytes* (Decapoda: Cambaridae) in the Floridan Aquifer System of Southwestern Georgia. *Southeast Nat* **2017**, *16*, 163-181.
222. Fiser, C.; Alther, R.; Zaksek, V.; Borko, S.; Fuchs, A.; Altermatt, F. Translating Niphargus barcodes from Switzerland into taxonomy with a description of two new species (Amphipoda, Niphargidae). *Zookeys* **2018**, 113-141.
223. Fiser, C.; Zgamaister, M.; Dethier, M. Overview of Niphargidae (Crustacea: Amphipoda) in Belgium: distribution, taxonomic notes and conservation issues. *Zootaxa* **2018**, *4387*, 47-74.
224. Foulquier, A.; Malard, F.; Lefebvre, T.; Gibert, J.; Douady, C.J. The imprint of Quaternary glaciers on the present-day distribution of the obligate groundwater amphipod *Niphargus virei* (Niphargidae). *J Biogeogr* **2008**, *35*, 552-564.
225. Goricki, S.; Stankovic, D.; Snoj, A.; Kuntner, M.; Jeffery, W.R.; Trontelj, P.; Pavicevic, M.; Grizelj, Z.; Naparus-Aljancic, M.; Aljancic, G. Environmental DNA in subterranean biology: range extension and taxonomic implications for *Proteus*. *Sci Rep-Uk* **2017**, *7*.
226. Gunn, J.; Hardwick, P.; Wood, P.J. The invertebrate community of the Peak-Speedwell cave system, Derbyshire, England pressures and considerations for conservation management. *Aquat Conserv* **2000**, *10*, 353-369.
227. Johns, T.; Jones, J.I.; Knight, L.; Maurice, L.; Wood, P.; Robertson, A. Regional-scale drivers of groundwater faunal distributions. *Freshw Sci* **2015**, *34*, 316-328.

228. Rodriguez, P.; Achurra, A. New species of aquatic oligochaetes (Annelida: Clitellata) from groundwaters in karstic areas of northern Spain, with taxonomic remarks on *Lophochaeta ignota* Stolc, 1886. *Zootaxa* **2010**, 21-39.
229. Voros, J.; Marton, O.; Schmidt, B.R.; Gal, J.T.; Jelic, D. Surveying Europe's Only Cave-Dwelling Chordate Species (*Proteus anguinus*) Using Environmental DNA. *Plos One* **2017**, 12.
230. Zaksek, V.; Sket, B.; Gottstein, S.; Franjevic, D.; Trontelj, P. The limits of cryptic diversity in groundwater: phylogeography of the cave shrimp *Troglocaris anophthalmus* (Crustacea: Decapoda: Atyidae). *Mol Ecol* **2009**, 18, 931-946.
231. Achurra, A.; Rodriguez, P. Biodiversity of groundwater oligochaetes from a karst unit in northern Iberian Peninsula: ranking subterranean sites for conservation management. *Hydrobiologia* **2008**, 605, 159-171.
232. Christian, E.; Spotl, C. Karst geology and cave fauna of Austria: a concise review. *Int J Speleol* **2010**, 39, 71-90.
233. Galassi, D.M.P.; Lombardo, P.; Fiasca, B.; Di Cioccio, A.; Di Lorenzo, T.; Petitta, M.; Di Carlo, P. Earthquakes trigger the loss of groundwater biodiversity. *Sci Rep-Uk* **2014**, 4.
234. Knight, L.R.F.D.; Penk, M.R. Groundwater Crustacea of Ireland: A Survey of the Stygobitic Malacostraca in Caves and Springs. *Biol Environ* **2010**, 110b, 211-235.
235. Lewis, J.J.; Graening, G.O.; Fenolio, D.B.; Bergey, E.A. *Caecidotea mackini*, new species, with a synopsis of the subterranean asellids of Oklahoma (Crustacea : Isopoda : Asellidae). *P Biol Soc Wash* **2006**, 119, 563-575.
236. Lupkes, G. 3 New Stygobiont Peritricha from Interstitial Groundwater Contribution to Knowledge About Stygobiont Peritrich Fauna of Germany. *Arch Hydrobiol* **1974**, 73, 394-402.
237. Manenti, R. Role of Cave Features for Aquatic Trogllobiont Fauna Occurrence: Effects on "Accidentals" and Troglomorphic Organisms Distribution. *Acta Zool Acad Sci H* **2014**, 60, 257-270.
238. Tang, D.; Knott, B. Freshwater cyclopoids and harpacticoids (Crustacea: Copepoda) from the Gngangara Mound region of Western Australia. *Zootaxa* **2009**, 1-70.
239. Achurra, A.; Rodriguez, P.; Reynoldson, T.B. Is the Cantabrian region of northern Spain a biodiversity hotspot for obligate groundwater fauna? The case of oligochaetes (Annelida, Clitellata). *Hydrobiologia* **2015**, 745, 151-166.
240. Guzik, M.T.; Stringer, D.N.; Murphy, N.P.; Cooper, S.J.B.; Taiti, S.; King, R.A.; Humphreys, W.F.; Austin, A.D. Molecular phylogenetic analysis of Australian arid-zone oniscidean isopods (Crustacea: Haloniscus) reveals strong regional endemism and new putative species. *Invertebr Syst* **2019**, 33, 556-574.
241. Brancelj, A. Two new stygobiotic copepod species from the Tibesti area (Northern Chad) and a re-description of *Pilocamptus schroederi* (van Douwe, 1915). *Zootaxa* **2015**, 3994, 531-555.
242. Hahn, H.R. Unbaited phreatic traps: A new method of sampling stygofauna. *Limnologia* **2005**, 35, 248-261.
243. Hilberg, S.; Eisendle-Flockner, U. About faunal life in Austrian aquifers - historical background and current developments. *Austrian J Earth Sci* **2016**, 109.
244. Por, F.D. Ophel: a groundwater biome based on chemoautotrophic resources. The global significance of the Ayyalon cave finds, Israel. *Hydrobiologia* **2007**, 592, 1-10.
245. Asmyhr, M.G.; Hose, G.; Graham, P.; Stow, A.J. Fine-scale genetics of subterranean syncarids. *Freshwater Biol* **2014**, 59, 1-11.
246. Asmyhr, M.G.; Linke, S.; Hose, G.; Nipperess, D.A. Systematic Conservation Planning for Groundwater Ecosystems Using Phylogenetic Diversity. *Plos One* **2014**, 9.
247. Asmyhr, M.G.; Stow, A.J.; Hose, G. The first set of microsatellite markers developed for the ancient Parabathynellidae (Syncarida, Malacostraca) and their utility for other groundwater fauna. *Conserv Genet Resour* **2012**, 4, 587-589.
248. Baratti, M.; Khebiza, M.Y.; Messina, G. Microevolutionary processes in the stygobitic genus *Typhlocirolana* (Isopoda Flabellifera Cirolanidae) as inferred by partial 12S and 16S rDNA sequences. *J Zool Syst Evol Res* **2004**, 42, 27-32.
249. Bruce, N.L. New species and a new genus of Cirolanidae (Isopoda : Cymothoida : Crustacea) from groundwater in calcretes in the Pilbarra, northern Western Australia. *Zootaxa* **2008**, 51-64.

250. Galassi, D.M.P. Groundwater copepods: diversity patterns over ecological and evolutionary scales. *Hydrobiologia* **2001**, *453*, 227-253.
251. Kayo, R.T.; Marmonier, P.; Togouet, S.H.Z.; Nola, M.; Piscart, C. An Annotated Checklist of Freshwater Stygobiotic Crustaceans of Africa and Madagascar. *Crustaceana* **2012**, *85*, 1613-1631.
252. Mcinerney, C.E.; Maurice, L.; Robertson, A.L.; Knight, L.R.F.D.; Arnscheidt, J.; Venditti, C.; Dooley, J.S.G.; Mathers, T.; Matthijs, S.; Eriksson, K., et al. The ancient Britons: groundwater fauna survived extreme climate change over tens of millions of years across NW Europe. *Mol Ecol* **2014**, *23*, 1153-1166.
253. Nakano, T.; Tomikawa, K.; Grygier, M.J. Rediscovered syntypes of Procrangonyx japonicus, with nomenclatural consideration of some crangonyctoidean subterranean amphipods (Crustacea: Amphipoda: Allocrangonyctidae, Niphargidae, Pseudocrangonyctidae). *Zootaxa* **2018**, *4532*, 86-94.
254. Rios-Escalante, P.D.L.; Parra-Coloma, L.; Peralta, M.A.; Perez-Schultheiss, J.; Rudolph, E.H. A checklist of subterranean water crustaceans from Chile (South America). *P Biol Soc Wash* **2016**, *129*, 114-128.
255. Robertson, A.L.; Smith, J.W.N.; Johns, T.; Proudlove, G.S. The distribution and diversity of stygobites in Great Britain: an analysis to inform groundwater management. *Q J Eng Geol Hydroge* **2009**, *42*, 359-368.
256. Rundle, S.D.; Bilton, D.T.; Shiozawa, D.K. Global and regional patterns in lotic meiofauna. *Freshwater Biol* **2000**, *44*, 123-134.
257. Sarkka, J.; Levonen, L.; Makela, J. Harpacticoid and cyclopoid fauna of groundwater and springs in southern Finland. *J Marine Syst* **1998**, *15*, 155-161.
258. Schon, I.; Martens, K.; Halse, S. Genetic diversity in Australian ancient asexual Vestalenula (Ostracoda, Darwinulidae): little variability down under. *Hydrobiologia* **2010**, *641*, 59-70.
259. Stocchino, G.A.; Sluys, R.; Kawakatsu, M.; Sarbu, S.M.; Manconi, R. A new species of freshwater flatworm (Platyhelminthes, Tricladida, Dendrocoelidae) inhabiting a chemoautotrophic groundwater ecosystem in Romania. *Eur J Taxon* **2017**, *342*, 1-21.
260. von Fumetti, S.; Bieri-Wigger, F.; Nagel, P. Temperature variability and its influence on macroinvertebrate assemblages of alpine springs. *Ecohydrology* **2017**, *10*.
261. Gibert, J.; Culver, D.C.; Dole-Olivier, M.J.; Malard, F.; Christman, M.C.; Deharveng, L. Assessing and conserving groundwater biodiversity: synthesis and perspectives. *Freshwater Biol* **2009**, *54*, 930-941.
262. Di Lorenzo, T.; Di Marzio, W.D.; Fiasca, B.; Galassi, D.M.P.; Korbel, K.; Iepure, S.; Pereira, J.L.; Reboleira, A.S.P.S.; Schmidt, S.I.; Hose, G.C. Recommendations for ecotoxicity testing with stygobiotic species in the framework of groundwater environmental risk assessment. *Sci Total Environ* **2019**, *681*, 292-304.
263. Galassi, D.M.P.; Huys, R.; Reid, J.W. Diversity, ecology and evolution of groundwater copepods. *Freshwater Biol* **2009**, *54*, 691-708.
264. Gerecke, R.; Martin, P.; Gledhill, T. Water mites (Acari: Parasitengona: Hydrachnidia) as inhabitants of groundwater-influenced habitats - considerations following an update of Limnofauna Europaea. *Limnologica* **2018**, *69*, 81-93.
265. Giani, N.; Sambugar, B.; Rodriguez, P.; Martinez-Ansemil, E. Oligochaetes in southern European groundwater: new records and an overview. *Hydrobiologia* **2001**, *463*, 65-74.
266. Hof, C.; Brandle, M.; Brandl, R. Latitudinal variation of diversity in European freshwater animals is not concordant across habitat types. *Global Ecol Biogeogr* **2008**, *17*, 539-546.
267. Lewis, J.J.; Reid, J.W. Patterns and processes of groundwater invasion by copepods in the interior low plateaus of the United States. *Acta Carsologica* **2007**, *36*, 279-289.
268. Masciopinto, C.; Semeraro, F.; La Mantia, R.; Inguscio, S.; Rossi, E. Stygofauna abundance and distribution in the fissures and caves of the Nardo (southern Italy) fractured aquifer subject to reclaimed water injections. *Geomicrobiol J* **2006**, *23*, 267-278.
269. Meland, K.; Mees, J.; Porter, M.; Wittmann, K.J. Taxonomic Review of the Orders Mysida and Stygiomysida (Crustacea, Peracarida). *Plos One* **2015**, *10*.

270. Villemant, C.; Daugeron, C.; Gargominy, O.; Isaia, M.; Deharveng, L.; Judson, M.L.I. The Mercantour/Alpi Marittime All Taxa Biodiversity Inventory (ATBI): achievements and prospects. *Zoosystema* **2015**, *37*, 667-679.
271. Wilson, G.D.F. Gondwanan groundwater: subterranean connections of Australian phreatoicidean isopods (Crustacea) to India and New Zealand. *Invertebr Syst* **2008**, *22*, 301-310.
